# Supplementary material for: The Antibiotic Fosfomycin Mimics the Effects of the Intermediate Metabolites Phosphoenolpyruvate and Glyceraldehyde-3-Phosphate on the Stenotrophomonas maltophilia Transcriptome
Source: MDPI journal article supplement (doi:10.3390/ijms23010159), 2021-12-23
Supplement: s1 [file s1]

**A****fosfo vs D457 (FDR  $\leq 0.05$  and  $|\log\text{Ratio}| \geq 1$ )**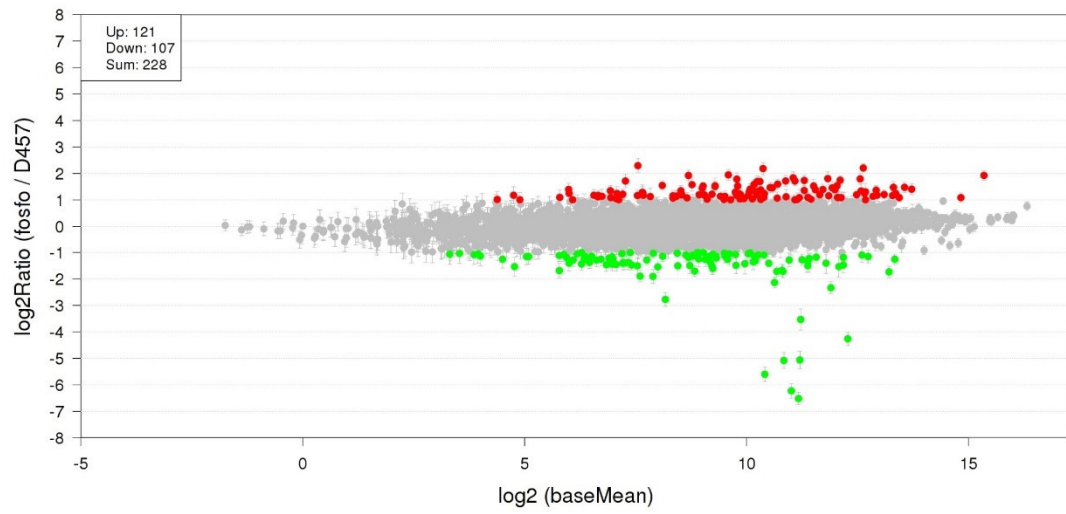**B****PEP vs D457 (FDR  $\leq 0.05$  and  $|\log\text{Ratio}| \geq 1$ )**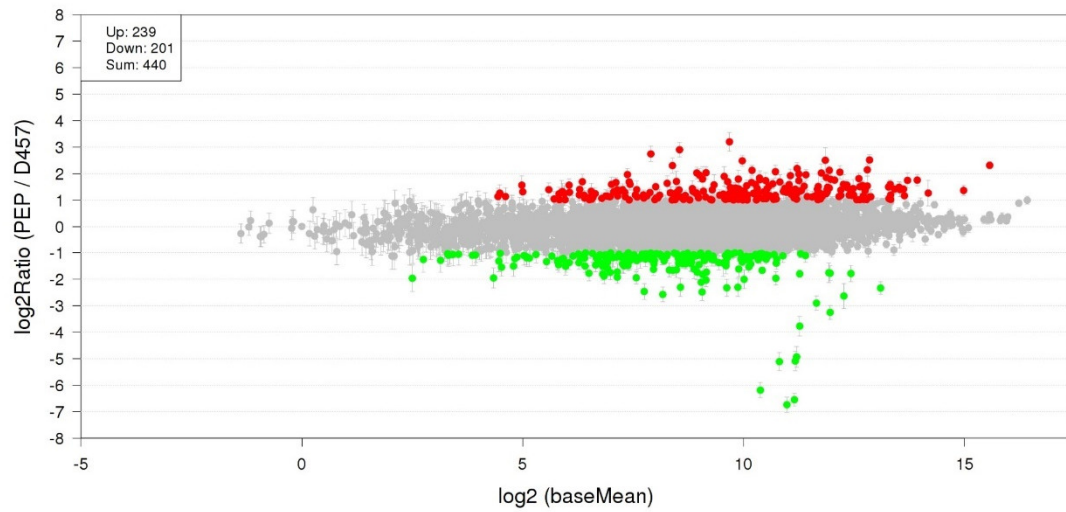**C****GA-3P3 vs D457 (FDR  $\leq 0.05$  and  $|\log\text{Ratio}| \geq 1$ )**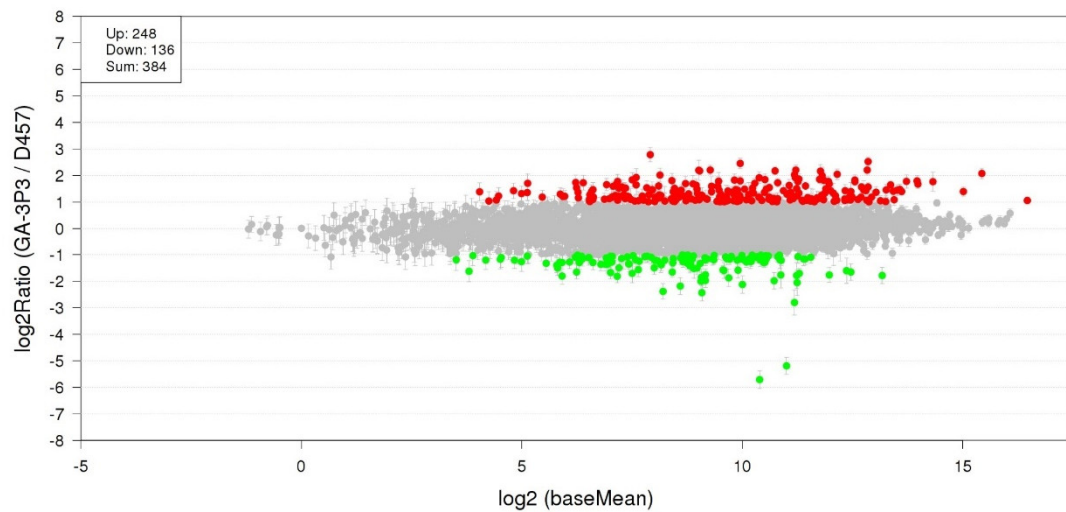

**Figure S1. Differential expression between sample groups and their statistical significance.** A) Fosfomycin; B) PEP and C) GA-3P. Fold changes were calculated as  $\log_2$  of RPKM after the treatment in comparison with the RPKM of the wild-type D457 strain without treatment. Fold changes  $<-1$  or  $> 1$  were considered significant.

**Table S1. List of putative *S. maltophilia* D457 T4SS effectors\* identified by BLAST search using XVIPCD domains from *X. citri* effectors.**

| <i>X. citri</i><br>XVIPCD | <i>S. maltophilia</i><br>D457 |                            |                            |                            |                            |                            |                            |                            |                            |                            |                            |                            |
|---------------------------|-------------------------------|----------------------------|----------------------------|----------------------------|----------------------------|----------------------------|----------------------------|----------------------------|----------------------------|----------------------------|----------------------------|----------------------------|
| Entry                     | Entry/E-value                 |                            |                            |                            |                            |                            |                            |                            |                            |                            |                            |                            |
| XAC4264<br>(140-279)      | SMD_RS10<br>655<br>6,0E-13    | SMD_RS13<br>930<br>2,0E-09 | SMD_RS13<br>920<br>5,0E-08 |                            |                            |                            |                            |                            |                            |                            |                            |                            |
| XAC3634<br>(189-306)      | SMD_RS01<br>005<br>3,0E-16    | SMD_RS13<br>735<br>5,0E-16 | SMD_RS01<br>500<br>2,0E-15 | SMD_RS03<br>560<br>3,0E-14 | SMD_RS13<br>725<br>9,0E-11 | SMD_RS10<br>655<br>5,0E-10 | SMD_RS02<br>370<br>4,0E-08 | SMD_RS13<br>930<br>1,0E-04 | SMD_RS00<br>480<br>2,0E-04 | SMD_RS02<br>350<br>4,0E-04 | SMD_RS13<br>920<br>2,0E-03 | SMD_RS12<br>385<br>5,6E+00 |
| XAC3266<br>(735-861)      | SMD_RS14<br>045<br>5,7E+00    |                            |                            |                            |                            |                            |                            |                            |                            |                            |                            |                            |
| XAC2885<br>(271-395)      | SMD_RS13<br>735<br>2,0E-12    | SMD_RS01<br>005<br>5,0E-08 | SMD_RS13<br>920<br>1,0E-06 | SMD_RS13<br>930<br>3,0E-06 | SMD_RS01<br>500<br>3,0E-05 |                            |                            |                            |                            |                            |                            |                            |
| XAC2609<br>(315-431)      | SMD_RS01<br>500<br>7,0E-27    | SMD_RS03<br>560<br>2,0E-21 | SMD_RS13<br>735<br>1,0E-20 | SMD_RS01<br>005<br>2,0E-16 | SMD_RS13<br>725<br>2,0E-11 | SMD_RS00<br>480<br>2,0E-06 | SMD_RS02<br>350<br>3,4E-02 |                            |                            |                            |                            |                            |
| XAC1918<br>(477-606)      | SMD_RS13<br>920<br>5,0E-25    | SMD_RS13<br>930<br>5,0E-25 | SMD_RS10<br>655<br>3,0E-19 | SMD_RS02<br>370<br>2,0E-18 | SMD_RS02<br>340<br>4,0E-16 | SMD_RS13<br>735<br>3,0E-07 | SMD_RS00<br>480<br>7,0E-07 | SMD_RS02<br>350<br>1,0E-06 | SMD_RS01<br>500<br>8,0E-06 | SMD_RS03<br>560<br>9,0E-03 |                            |                            |
| XAC1165<br>(1-112)        | SMD_RS02<br>370<br>5,0E-28    | SMD_RS13<br>930<br>8,0E-26 | SMD_RS10<br>655<br>1,0E-24 | SMD_RS13<br>920<br>5,0E-24 | SMD_RS02<br>340<br>4,0E-18 | SMD_RS02<br>350<br>3,0E-13 | SMD_RS13<br>725<br>3,0E-11 | SMD_RS00<br>480<br>1,0E-10 |                            |                            |                            |                            |

|                      |                            |                            |                            |                            |                            |                            |                            |                            |                            |                            |  |
|----------------------|----------------------------|----------------------------|----------------------------|----------------------------|----------------------------|----------------------------|----------------------------|----------------------------|----------------------------|----------------------------|--|
| XAC0574<br>(317-440) | SMD_RS13<br>725<br>3,0E-44 | SMD_RS10<br>655<br>5,0E-15 | SMD_RS13<br>930<br>1,0E-14 | SMD_RS13<br>920<br>1,0E-12 | SMD_RS13<br>735<br>1,0E-12 | SMD_RS01<br>005<br>5,0E-12 | SMD_RS02<br>370<br>1,0E-11 |                            |                            |                            |  |
| XAC0466<br>(488-584) | SMD_RS14<br>175<br>2,0E-18 | SMD_RS14<br>175<br>9,0E-14 |                            |                            |                            |                            |                            |                            |                            |                            |  |
| XAC0323<br>(16-136)  | SMD_RS02<br>370<br>1,0E-25 | SMD_RS10<br>655<br>1,0E-22 | SMD_RS02<br>340<br>2,0E-22 | SMD_RS13<br>930<br>1,0E-21 | SMD_RS13<br>920<br>1,0E-20 | SMD_RS00<br>480<br>1,0E-11 |                            |                            |                            |                            |  |
| XAC0151<br>(120-254) | SMD_RS02<br>370<br>3,0E-36 | SMD_RS10<br>655<br>8,0E-32 | SMD_RS13<br>930<br>1,0E-29 | SMD_RS13<br>920<br>2,0E-29 | SMD_RS02<br>340<br>9,0E-29 | SMD_RS02<br>350<br>4,0E-18 | SMD_RS00<br>480<br>2,0E-15 | SMD_RS13<br>735<br>3,0E-11 | SMD_RS13<br>725<br>2,0E-06 | SMD_RS03<br>560<br>2,0E-05 |  |
| XAC0096<br>(506-646) | SMD_RS10<br>655<br>4,0E-21 | SMD_RS13<br>930<br>5,0E-20 | SMD_RS13<br>920<br>1,0E-16 | SMD_RS02<br>370<br>2,0E-16 | SMD_RS02<br>340<br>6,0E-15 | SMD_RS13<br>725<br>1,0E-09 | SMD_RS13<br>735<br>5,0E-09 | SMD_RS02<br>350<br>1,0E-06 | SMD_RS01<br>500<br>6,0E-05 | SMD_RS03<br>560<br>7,0E-03 |  |

\*Effectors are color coded according to their accession number and organized according to the e-value.

**Table S2 Primers used in this study**

| <b>Primer</b>   | <b>Sequence (5' - 3')</b> | <b>Description</b>                                            |
|-----------------|---------------------------|---------------------------------------------------------------|
| 27              | TGCCAGCGACAGTGCAAAGGGTC   | Amplification of <i>smeT</i> to test DNA contamination        |
| 48              | CCGTGTTCATGGAAGCAGGC      |                                                               |
| <i>gyrA_F</i>   | CGCAAGAGXTACCTCGATTA      | To amplify the housekeeping gene <i>gyrA</i> by real-time PCR |
| <i>gyrA_R</i>   | GGTGGTACTTACCGATGACG      |                                                               |
| <i>virB2_F</i>  | AATCTGGTAGCCAGCAAAGA      | To amplify <i>virB2</i> by real-time PCR                      |
| <i>virB2_R</i>  | ACGCTGAAGACTCTGCTGAT      |                                                               |
| <i>virB8_F</i>  | CCAGCTGGTTGTCAAGGTAG      | To amplify <i>virB8</i> by real-time PCR                      |
| <i>VirB8_R</i>  | GTAACCCTCAGAACCCGTTT      |                                                               |
| <i>virB9_F</i>  | CAGTACAAGATCGCCTTCGT      | To amplify <i>virB9</i> by real-time PCR                      |
| <i>virB9_R</i>  | GAAACGACCATCGTCATAGG      |                                                               |
| <i>virB10_F</i> | GTCCAAAATGTCTCCAATGC      | To amplify <i>virB10</i> by real-time PCR                     |
| <i>virB10_R</i> | ATAGATCTTGGAGCCCTTCG      |                                                               |
| <i>virD4_F</i>  | TCAAGCAGGAGAACTTCGAC      | To amplify <i>virD4</i> by real-time PCR                      |
| <i>virD4_R</i>  | TACAGGGTAAAGGCCATGAA      |                                                               |
| <i>fruK_F</i>   | AACATCAAGCTGGTGAAGA       | To amplify <i>fruK</i> by real-time PCR                       |
| <i>fruK_R</i>   | GCCACTGGTATCCAGCAGTA      |                                                               |
| <i>fruA_F</i>   | TCGGCCTGTTGATGATGTAT      | To amplify <i>fruA</i> by real-time PCR                       |
| <i>fruA_R</i>   | GGAAATCAATGCGGTAGAG       |                                                               |
| <i>rpfN_F</i>   | TGATCGAGGATCATTTCCTG      | To amplify <i>rpfN</i> by real-time PCR                       |
| <i>rpfN_R</i>   | CCATAGCTCAGCTCCATCAT      |                                                               |
| <i>dld_F</i>    | GTTCCACCAGGACTACATCG      | To amplify <i>dld</i> by real-time PCR                        |
| <i>dld_R</i>    | CCTTTTTCCTTCGAGGTCTG      |                                                               |

| Primer        | Sequence (5' - 3')   | Description                             |
|---------------|----------------------|-----------------------------------------|
| <i>lctD_F</i> | GACCTGAGCCTGGAAACC   | To amplify <i>lctD</i> by real-time PCR |
| <i>lctD_R</i> | ACGTACAGCTGGAACCACAT |                                         |
| <i>lldR_F</i> | GAATACCGTTTTGACGTGCT | To amplify <i>lldR</i> by real-time PCR |
| <i>lldR_R</i> | CGTCAGCCTCTGCTTCAC   |                                         |
| <i>lctP_F</i> | GTTCGGATACCTCGTCCAAT | To amplify <i>lctP</i> by real-time PCR |
| <i>lctP_R</i> | GTGAAAATCAGGCTGTGCTT |                                         |
| <i>smeY_F</i> | CATTGGTGACCGAAGGTG   | To amplify <i>smeY</i> by real-time PCR |
| <i>smeY_R</i> | TTGATACCGGAGAACAGCAG |                                         |
| <i>smeZ_F</i> | TGTACGAGAGCTGGTCGATT | To amplify <i>smeZ</i> by real-time PCR |
| <i>smeZ_R</i> | GAACTCGACAATGAGGATCG |                                         |
| <i>oprO_F</i> | GAACAAGGATGACACCGAG  | To amplify <i>oprO</i> by real-time PCR |
| <i>oprO_R</i> | TCCAGCGAGAAATACTGCTT |                                         |
